# Supplementary material for: Fabrication of temperature- and pH-sensitive liquid-crystal droplets with PNIPAM-b-LCP and SDS coatings by microfluidics
Source: Royal Society of Chemistry journal article supplement (doi:10.1039/c4tb00476k), 2014-01-01
Supplement: c4tb00476k1.pdf [file c4tb00476k1.pdf]

## Supporting Information

### **Fabrication of temperature- and pH-sensitive liquid-crystal droplets with PNIPAM-*b*-LCP and SDS coatings by microfluidics**

Yong-Dae Jung, Mashooq Khan and Soo-Young Park\*

Department of Polymer Science, Kyungpook National University, 1370 Sangyuk-dong, Buk-gu, Daegu  
702-701, Korea

\*To whom correspondence should be addressed.

Tel.: +82-53-950-5630; fax: +82-53-950-6623; e-mail: [psy@knu.ac.kr](mailto:psy@knu.ac.kr)

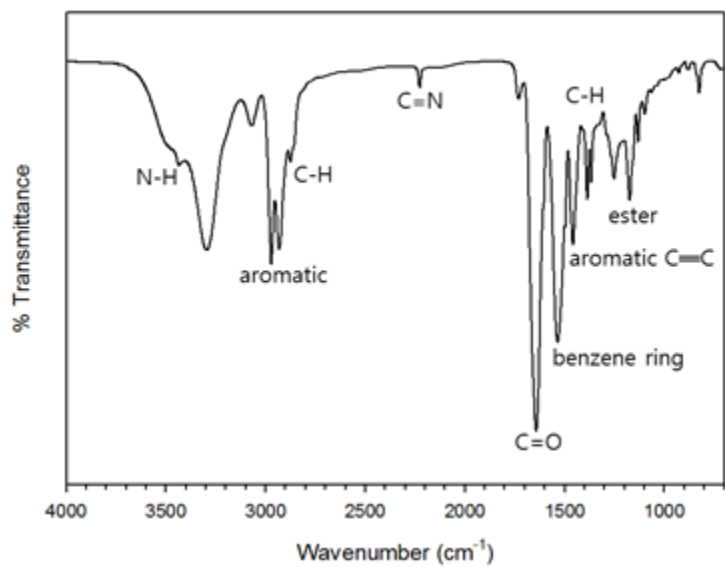

(a)

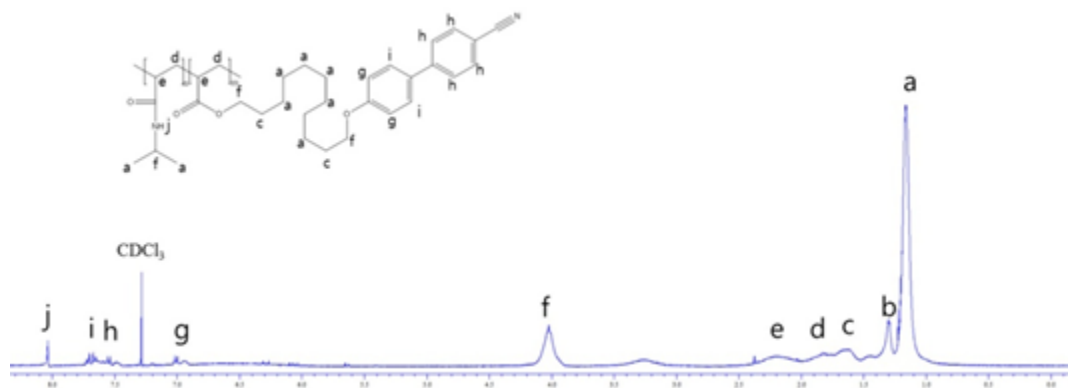

(b)

**Figure S1.** (a) FT-IR and (b)  $^1\text{H}$  NMR (400 MHz, in  $\text{CDCl}_3$ ) spectra of the synthesized PNIPAM(43.5K)-*b*-LCP(10.5K).
